# Supplementary material for: Chromosome-level genome sequence of the Genetically Improved Farmed Tilapia (GIFT, Oreochromis niloticus) highlights regions of introgression with O. mossambicus
Source: PubMed Central journal article supplement (PMC9756657; doi:10.1186/s12864-022-09065-8), 2022-12-15

**A**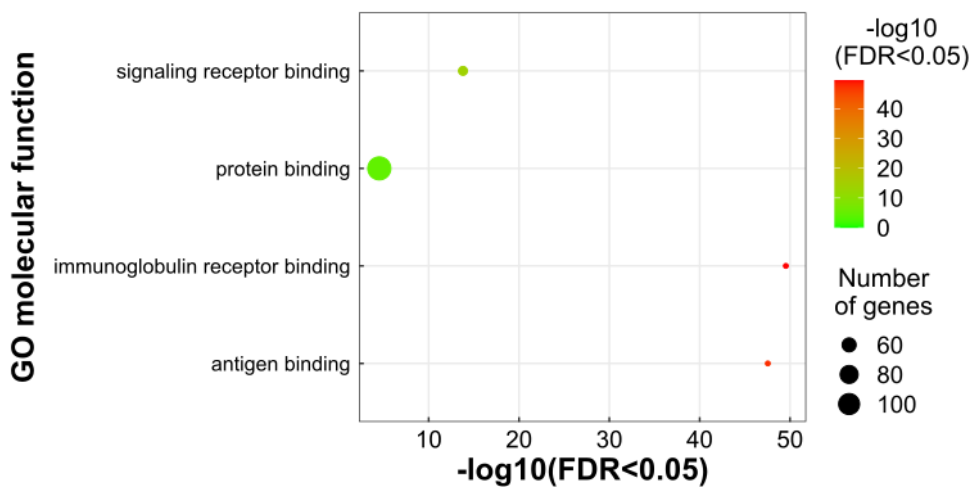**B**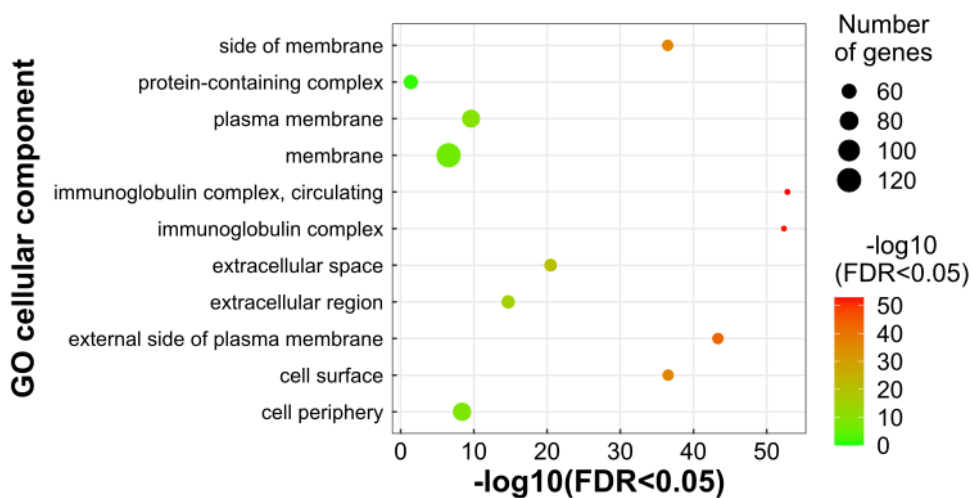**C**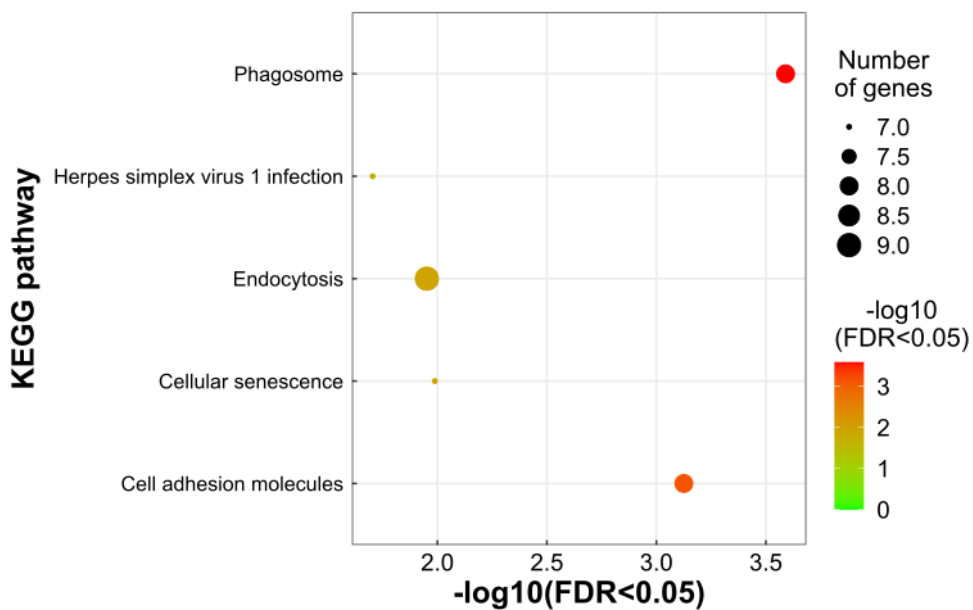

Supplement: 12864_2022_9065_MOESM7_ESM.pdf [file 12864_2022_9065_MOESM7_ESM.pdf]
